# Supplementary material for: Ergosterol and Its Metabolites Induce Ligninolytic Activity in the Lignin-Degrading Fungus Phanerochaete sordida YK-624
Source: MDPI journal article supplement (doi:10.3390/jof9090951), 2023-09-20
Supplement: s1 [file s1]

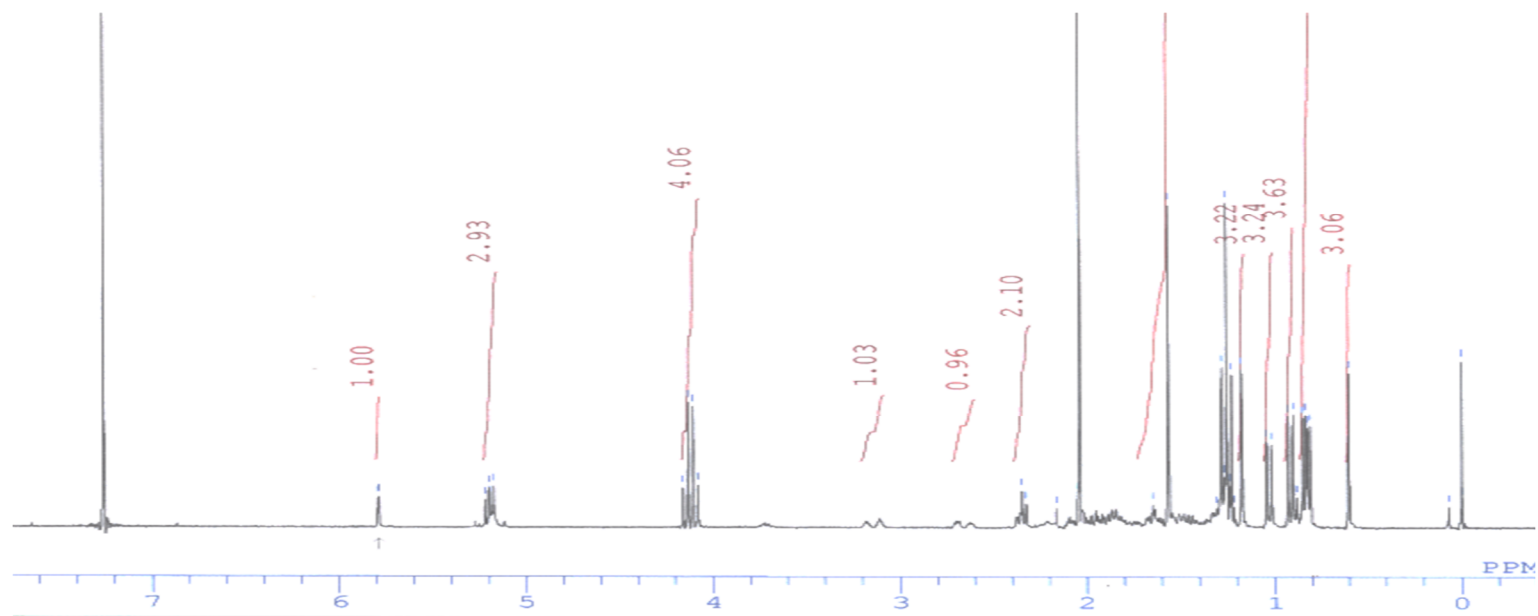

**Figure S1.**  $^1\text{H}$  NMR spectrum of the compound 4 ( $\text{CDCl}_3$ ).

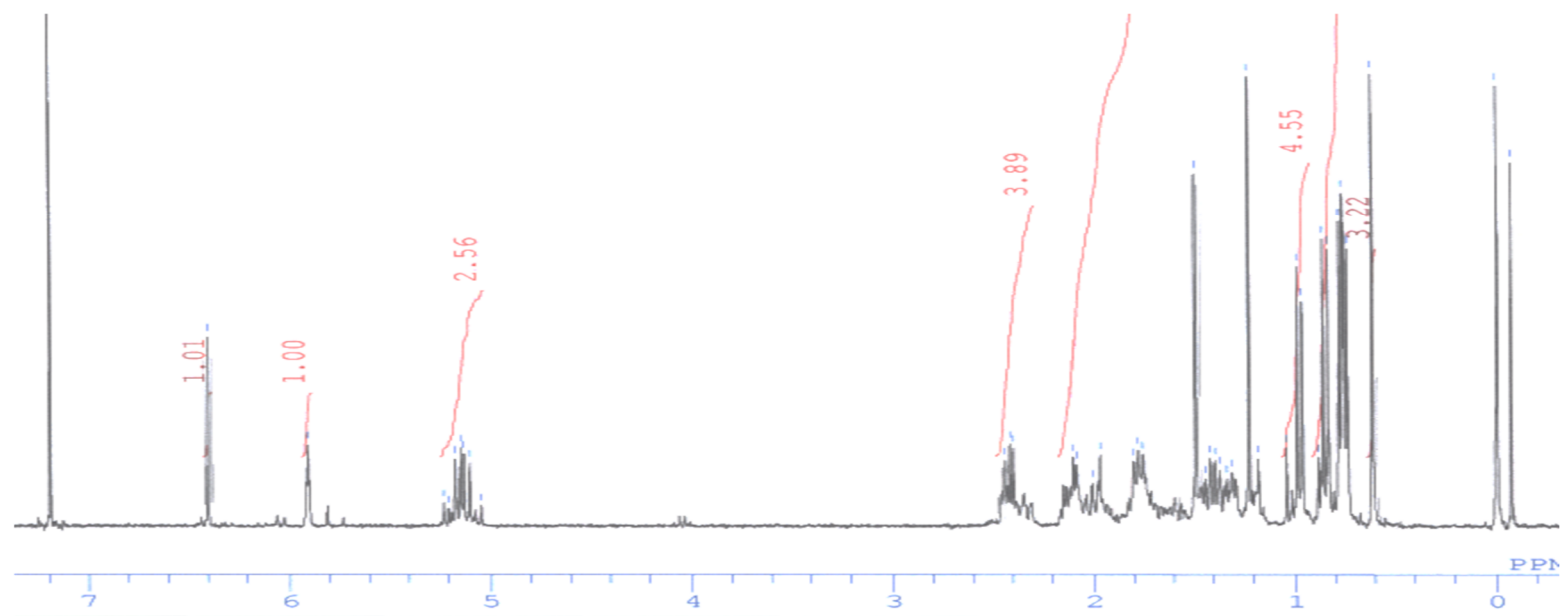

**Figure S2.**  $^1\text{H}$  NMR spectrum of the compound 2 ( $\text{CDCl}_3$ ).

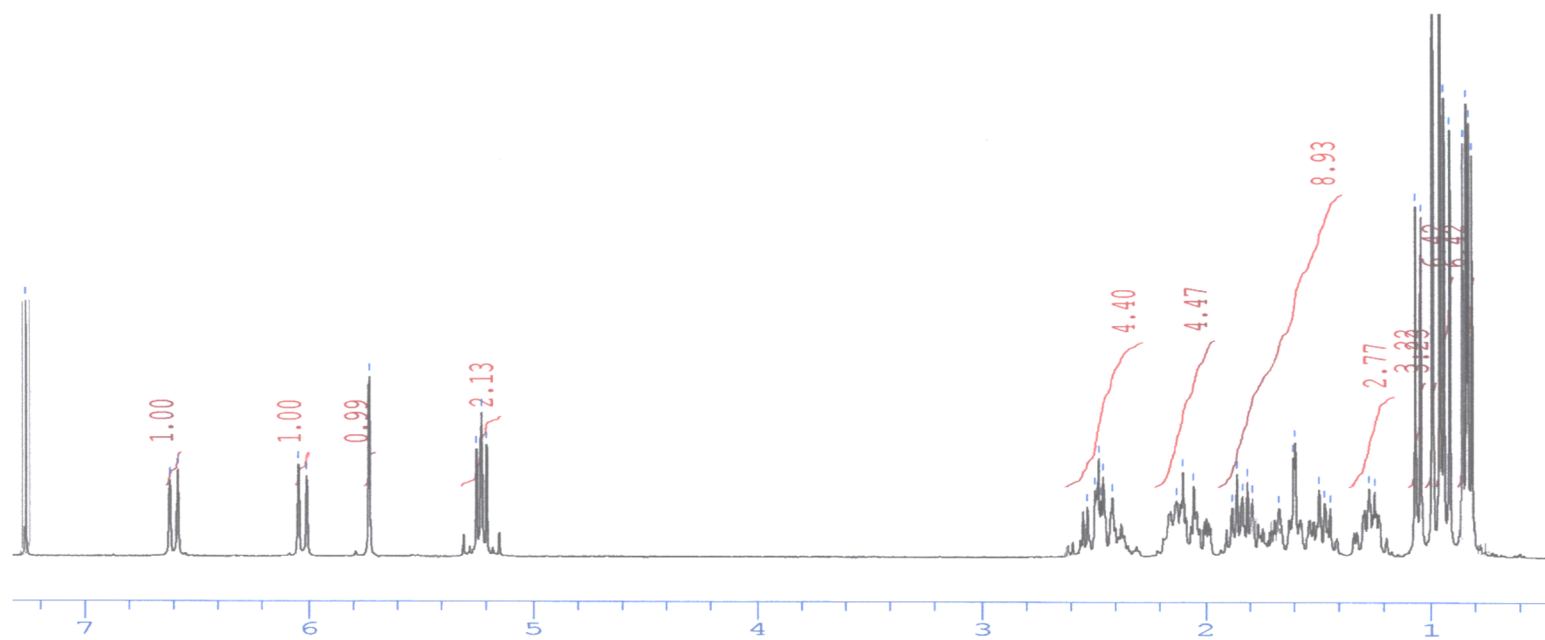

**Figure S3.**  $^1\text{H}$  NMR spectrum of the compound 3 ( $\text{CDCl}_3$ ).

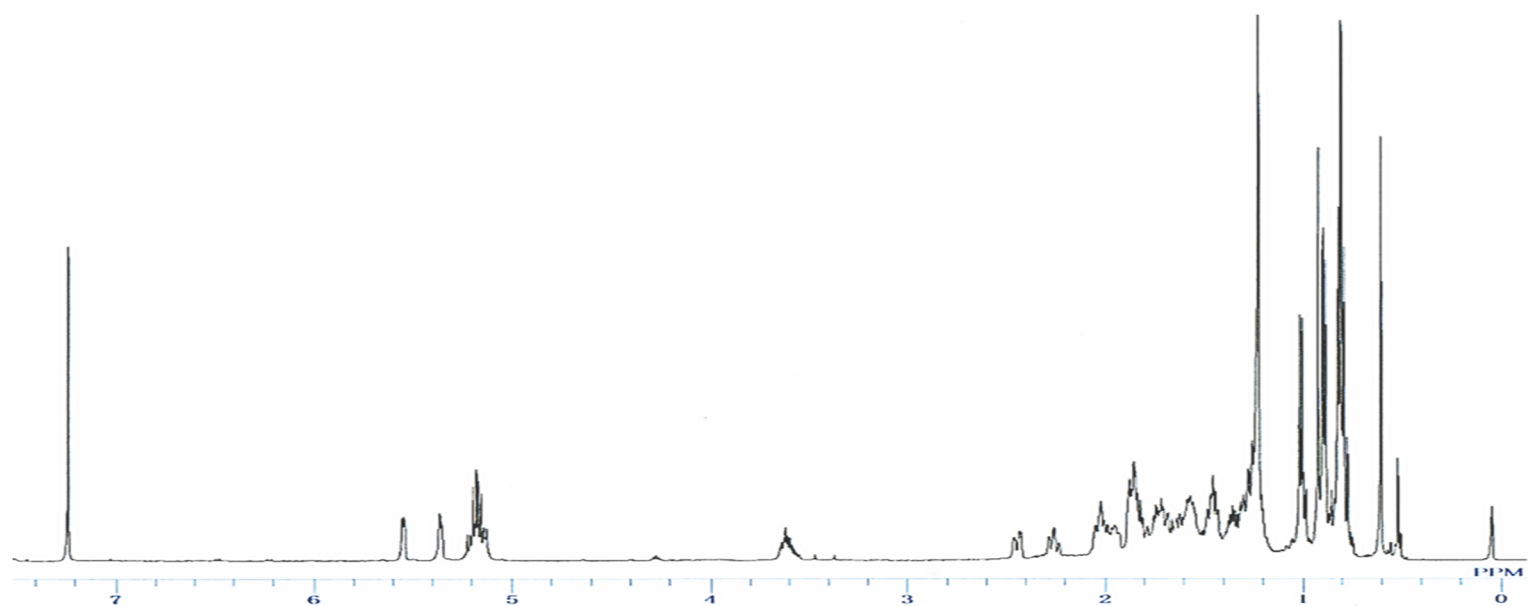

**Figure S4.**  $^1\text{H}$  NMR spectrum of the compound 1 ( $\text{CDCl}_3$ ).
